# Supplementary material for: Complex multi-modal sensory integration and context specificity in colour preferences of a pierid butterfly
Source: Oxford University Press journal article supplement (doi:10.1242/jeb.223271), 2020-01-01
Supplement: jeb223271supp.pdf [file jeb223271supp.pdf]

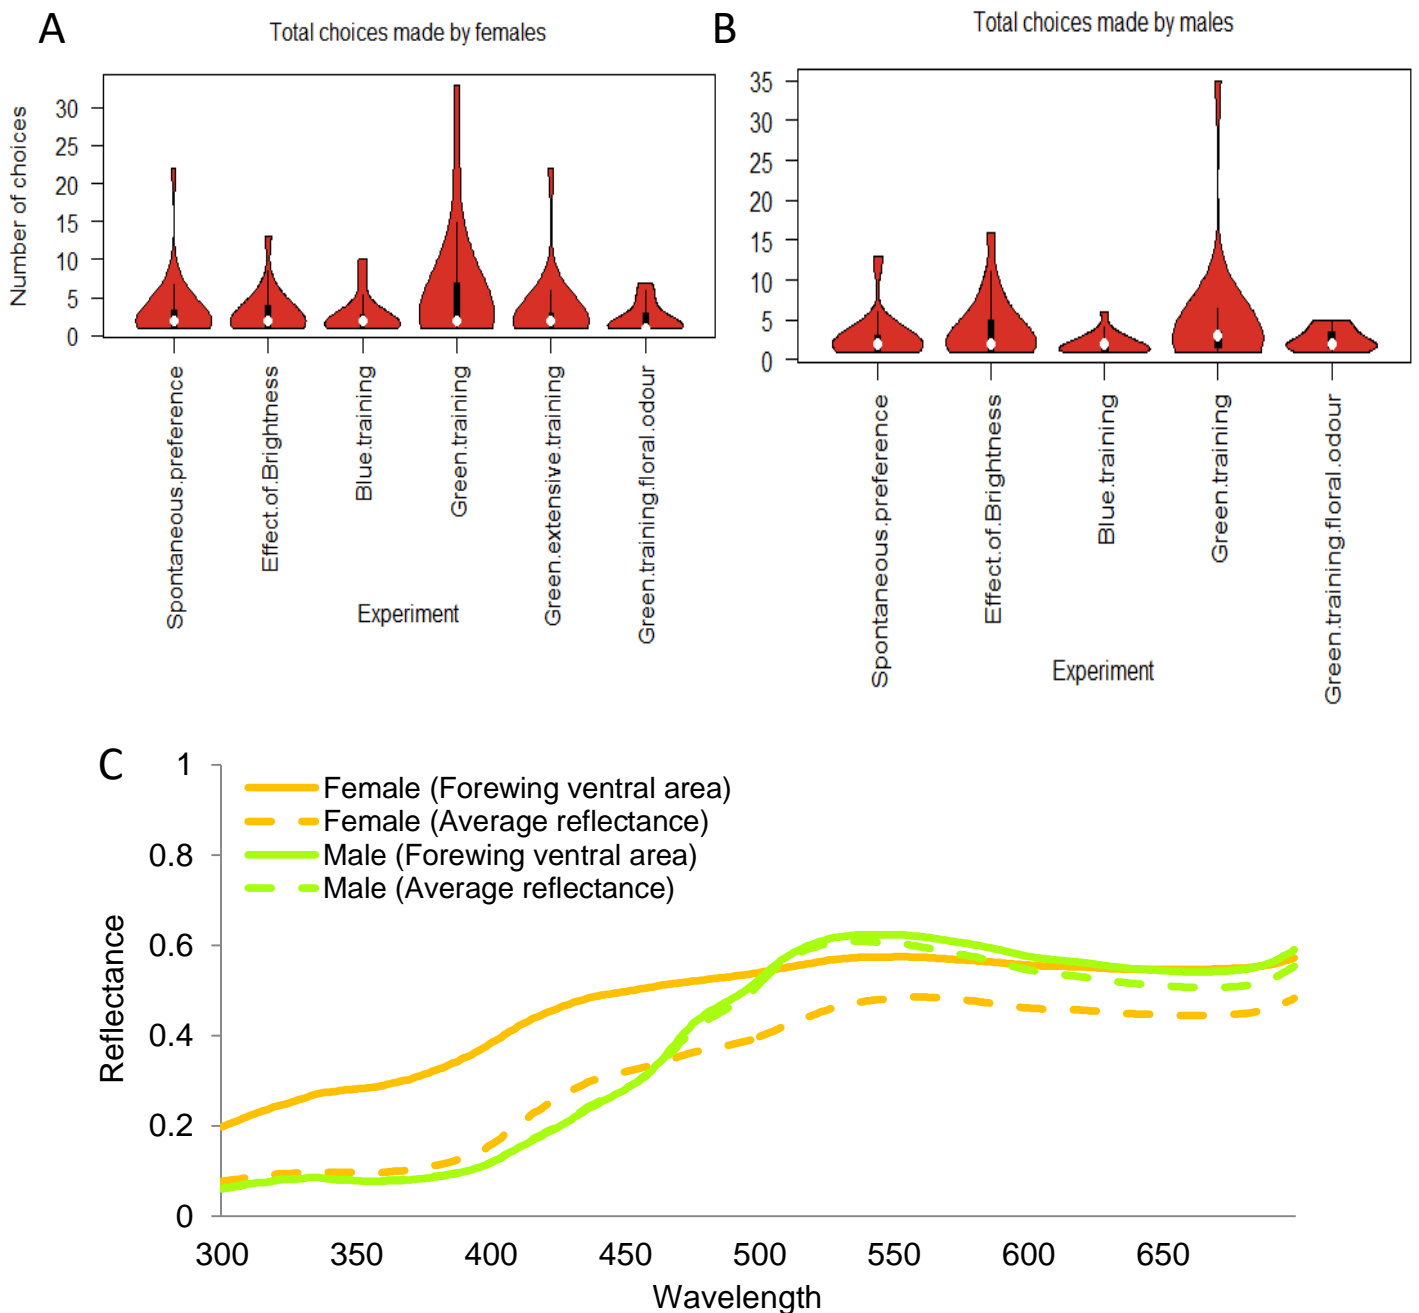

Figure S1. Violin plots for the distribution of total choices made by A) females and B) males in the experiments. The white circle represents the median and the black rectangle depicts the interquartile range. C) Spectral reflectance curves of *C. pomona* male (n=2) and female (n=2) wings. Reflectance was measured from eight different spots from each butterfly and averaged. Females showed two distinct patterns of reflectance – UV-reflecting white in the ventral region of the forewing and yellow reflectance in other regions. On the other hand males did not show any difference in reflectance across the wing regions sampled.

**SUPPLEMENTARY TABLE 1**

| Pair-wise comparisons | Females                              |                                      | Males                                |                                      |
|-----------------------|--------------------------------------|--------------------------------------|--------------------------------------|--------------------------------------|
|                       | First choice Chi-square tests        | Total choices Chi-square tests       | First choice Chi-square tests        | Total choices Chi-square tests       |
| Blue vs Green         | $\chi^2 = 0$ , df = 1, $p=1$         | $\chi^2 = 0.72$ , df = 1, $p=0.39$   | $\chi^2 = 21.33$ , df = 1, $p<0.001$ | $\chi^2 = 8.65$ , df = 1, $p=0.003$  |
| Blue vs Yellow        | $\chi^2 = 46.41$ , df = 1, $p<0.001$ | $\chi^2 = 32.01$ , df = 1, $p<0.001$ | $\chi^2 = 0.21$ , df = 1, $p=0.65$   | $\chi^2 = 0.68$ , df = 1, $p=0.512$  |
| Blue vs Red           | $\chi^2 = 3.24$ , df = 1, $p=0.07$   | $\chi^2 = 0.14$ , df = 1, $p=0.71$   | $\chi^2 = 10.28$ , df = 1, $p=0.001$ | $\chi^2 = 19.56$ , df = 1, $p<0.001$ |
| Green vs Yellow       | $\chi^2 = 46.41$ , df = 1, $p<0.001$ | $\chi^2 = 39.5$ , df = 1, $p<0.001$  | $\chi^2 = 17.81$ , df = 1, $p<0.001$ | $\chi^2 = 13.52$ , df = 1, $p<0.001$ |
| Green vs Red          | $\chi^2 = 3.24$ , df = 1, $p=0.07$   | $\chi^2 = 1.5$ , df = 1, $p=0.22$    | $\chi^2 = 2.66$ , df = 1, $p=0.11$   | $\chi^2 = 2.9$ , df = 1, $p=0.08$    |
| Yellow vs Red         | $\chi^2 = 29.76$ , df = 1, $p<0.001$ | $\chi^2 = 28.6$ , df = 1, $p<0.001$  | $\chi^2 = 7.69$ , df = 1, $p=0.005$  | $\chi^2 = 25.92$ , df = 1, $p<0.001$ |

Table S1: Pair-wise comparisons between colours in females (n=24) and males (n=25) (Experiment 1). Chi-square tests were done with Bonferroni correction to compare first choices and total visits. Corrected  $p=0$ .

**SUPPLEMENTARY TABLE 2**

| Pair-wise comparisons | Females                                                     |                                                            | Males                                                       |                                                             |
|-----------------------|-------------------------------------------------------------|------------------------------------------------------------|-------------------------------------------------------------|-------------------------------------------------------------|
|                       | First choice Chi-square tests                               | Total choices Chi-square tests                             | First choice Chi-square tests                               | Total choices Chi-square tests                              |
| Blue vs Green         | $\chi^2 = 72$ , df = 1, <b><math>p &lt; 0.001</math></b>    | $\chi^2 = 62.8$ , df = 1, <b><math>p &lt; 0.001</math></b> | $\chi^2 = 31.25$ , df = 1, <b><math>p &lt; 0.001</math></b> | $\chi^2 = 41.02$ , df = 1, <b><math>p &lt; 0.001</math></b> |
| Blue vs Yellow        | $\chi^2 = 19.36$ , df = 1, <b><math>p &lt; 0.001</math></b> | $\chi^2 = 35.8$ , df = 1, <b><math>p &lt; 0.001</math></b> | $\chi^2 = 31.25$ , df = 1, <b><math>p &lt; 0.001</math></b> | $\chi^2 = 41.02$ , df = 1, <b><math>p &lt; 0.001</math></b> |
| Blue vs Red           | $\chi^2 = 72$ , df = 1, <b><math>p &lt; 0.001</math></b>    | $\chi^2 = 60.2$ , df = 1, <b><math>p &lt; 0.001</math></b> | $\chi^2 = 51.42$ , df = 1, <b><math>p &lt; 0.001</math></b> | $\chi^2 = 51.54$ , df = 1, <b><math>p &lt; 0.001</math></b> |
| Green vs Yellow       | $\chi^2 = 28$ , df = 1, <b><math>p &lt; 0.001</math></b>    | $\chi^2 = 8.04$ , df = 1, <b><math>p = 0.004</math></b>    | $\chi^2 = 0$ , df = 1, $p = 1$                              | $\chi^2 = 0$ , df = 1, $p = 1$                              |
| Green vs Red          | $\chi^2 = 0$ , df = 1, $p = 1$                              | $\chi^2 = 0.111$ , df = 1, $p = 0.74$                      | $\chi^2 = 5$ , df = 1, $p = 0.02$                           | $\chi^2 = 1.31$ , df = 1, $p = 0.25$                        |
| Yellow vs Red         | $\chi^2 = 28$ , df = 1, <b><math>p &lt; 0.001</math></b>    | $\chi^2 = 6.54$ , df = 1, $p < 0.01$                       | $\chi^2 = 5$ , df = 1, $p = 0.02$                           | $\chi^2 = 1.31$ , df = 1, $p = 0.25$                        |

Table S2: Pair-wise comparisons between colours in females (n=18) and males (n=20) (Experiment 3-Blue training). Chi-square tests were done with Bonferroni correction to compare done to compare first choices and total visits. Corrected  $p = 0.008$ . Significant results are in bold font.

## SUPPLEMENTARY TABLE 3

| Pair-wise comparisons | Females                                                     |                                                             | Males                                                       |                                                             |
|-----------------------|-------------------------------------------------------------|-------------------------------------------------------------|-------------------------------------------------------------|-------------------------------------------------------------|
|                       | First choice Chi-square tests                               | Total choices Chi-square tests                              | First choice Chi-square tests                               | Total choices Chi-square tests                              |
| Blue vs Green         | $\chi^2 = 46.53$ , df = 1, <b><math>p &lt; 0.001</math></b> | $\chi^2 = 30.42$ , df = 1, <b><math>p &lt; 0.001</math></b> | $\chi^2 = 37.37$ , df = 1, <b><math>p &lt; 0.001</math></b> | $\chi^2 = 34.72$ , df = 1, <b><math>p &lt; 0.001</math></b> |
| Blue vs Yellow        | $\chi^2 = 17.85$ , df = 1, <b><math>p &lt; 0.001</math></b> | $\chi^2 = 35.28$ , df = 1, <b><math>p &lt; 0.001</math></b> | $\chi^2 = 1.38$ , df = 1, $p = 0.239$                       | $\chi^2 = 1.69$ , df = 1, $p = 0.193$                       |
| Blue vs Red           | $\chi^2 = 0$ , df = 1, $p = 1$                              | $\chi^2 = 1.92$ , df = 1, $p = 0.166$                       | $\chi^2 = 16$ , df = 1, <b><math>p &lt; 0.001</math></b>    | $\chi^2 = 0$ , df = 1, $p = 1$                              |
| Green vs Yellow       | $\chi^2 = 10$ , df = 1, <b><math>p = 0.001</math></b>       | $\chi^2 = 0.28$ , df = 1, $p = 0.596$                       | $\chi^2 = 48.76$ , df = 1, <b><math>p &lt; 0.001</math></b> | $\chi^2 = 23.4$ , df = 1, <b><math>p &lt; 0.001</math></b>  |
| Green vs Red          | $\chi^2 = 46.53$ , df = 1, <b><math>p &lt; 0.001</math></b> | $\chi^2 = 20.48$ , df = 1, <b><math>p &lt; 0.001</math></b> | $\chi^2 = 74$ , df = 1, <b><math>p &lt; 0.001</math></b>    | $\chi^2 = 34.72$ , df = 1, <b><math>p &lt; 0.001</math></b> |
| Yellow vs Red         | $\chi^2 = 17.85$ , df = 1, <b><math>p &lt; 0.001</math></b> | $\chi^2 = 24.89$ , df = 1, <b><math>p &lt; 0.01</math></b>  | $\chi^2 = 10$ , df = 1, <b><math>p = 0.001</math></b>       | $\chi^2 = 1.69$ , df = 1, $p = 0.193$                       |

Table S3: Pair-wise comparisons between colours in females (n=20) and males (n=19) (Experiment 3 – Green training). Chi-square tests were done with Bonferroni correction to compare done to compare first choices and total visits. Corrected  $p = 0.008$ . Significant results are in bold font.

**SUPPLEMENTARY TABLE 4**

| Pair-wise comparisons | Females                                                                |                                                                        |
|-----------------------|------------------------------------------------------------------------|------------------------------------------------------------------------|
|                       | First choice<br>Chi-square tests                                       | Total choices<br>Chi-square tests                                      |
| Blue vs Green         | $\chi^2 = 76$ , <b>df = 1</b> ,<br><b><math>p &lt; 0.001</math></b>    | $\chi^2 = 65.22$ , <b>df = 1</b> ,<br><b><math>p &lt; 0.001</math></b> |
| Blue vs Yellow        | $\chi^2 = 12$ , <b>df = 1</b> ,<br><b><math>p &lt; 0.001</math></b>    | $\chi^2 = 10.89$ , <b>df = 1</b> ,<br><b><math>p &lt; 0.001</math></b> |
| Blue vs Red           | $\chi^2 = 12$ , <b>df = 1</b> ,<br><b><math>p &lt; 0.001</math></b>    | $\chi^2 = 6.23$ , <b>df = 1</b> ,<br>$p = 0.112$                       |
| Green vs Yellow       | $\chi^2 = 46.54$ , <b>df = 1</b> ,<br><b><math>p &lt; 0.001</math></b> | $\chi^2 = 34.77$ , <b>df = 1</b> ,<br><b><math>p &lt; 0.001</math></b> |
| Green vs Red          | $\chi^2 = 46.54$ , <b>df = 1</b> ,<br><b><math>p &lt; 0.001</math></b> | $\chi^2 = 43.9$ , <b>df = 1</b> ,<br><b><math>p &lt; 0.001</math></b>  |
| Yellow vs Red         | $\chi^2 = 0$ , <b>df = 1</b> , $p = 1$                                 | $\chi^2 = 0.926$ , <b>df = 1</b> ,<br>$p = 0.336$                      |

Table S4: Pair-wise comparisons between colours in females (n=17) (Experiment 4). Chi-square tests were done with Bonferroni correction to compare done to compare first choices and total visits. Corrected  $p = 0.008$ . Significant results are in bold font.

## SUPPLEMENTARY TABLE 5

| Pair-wise comparisons | Females                                                     |                                                             | Males                                                       |                                        |
|-----------------------|-------------------------------------------------------------|-------------------------------------------------------------|-------------------------------------------------------------|----------------------------------------|
|                       | First choice Chi-square tests                               | Total choices Chi-square tests                              | First choice Chi-square tests                               | Total choices Chi-square tests         |
| Blue vs Green         | $\chi^2 = 24$ , df = 1, <b><math>p &lt; 0.001</math></b>    | $\chi^2 = 2.79$ , df = 1, $p = 0.094$                       | $\chi^2 = 30.26$ , df = 1, <b><math>p &lt; 0.001</math></b> | $\chi^2 = 23.83$ , df = 1, $p < 0.001$ |
| Blue vs Yellow        | $\chi^2 = 59$ , df = 1, <b><math>p &lt; 0.001</math></b>    | $\chi^2 = 35.71$ , df = 1, <b><math>p &lt; 0.001</math></b> | $\chi^2 = 0$ , df = 1, $p = 1$                              | $\chi^2 = 0.133$ , df = 1, $p = 0.715$ |
| Blue vs Red           | $\chi^2 = 18$ , df = 1, <b><math>p &lt; 0.001</math></b>    | $\chi^2 = 0.04$ , df = 1, $p = 0.827$                       | $\chi^2 = 0$ , df = 1, $p = 1$                              | $\chi^2 = 0.31$ , df = 1, $p = 0.577$  |
| Green vs Yellow       | $\chi^2 = 14.79$ , df = 1, <b><math>p = 0.001</math></b>    | $\chi^2 = 21.27$ , df = 1, <b><math>p &lt; 0.001</math></b> | $\chi^2 = 30.26$ , df = 1, <b><math>p &lt; 0.001</math></b> | $\chi^2 = 26.89$ , df = 1, $p < 0.001$ |
| Green vs Red          | $\chi^2 = 0.85$ , df = 1, $p = 0.855$                       | $\chi^2 = 2.13$ , df = 1, $p = 0.144$                       | $\chi^2 = 30.26$ , df = 1, <b><math>p &lt; 0.001</math></b> | $\chi^2 = 28.52$ , df = 1, $p < 0.001$ |
| Yellow vs Red         | $\chi^2 = 21.83$ , df = 1, <b><math>p &lt; 0.001</math></b> | $\chi^2 = 33.81$ , df = 1, <b><math>p &lt; 0.01</math></b>  | $\chi^2 = 0$ , df = 1, $p = 1$                              | $\chi^2 = 0.037$ , df = 1, $p = 0.847$ |

Table S5: Pair-wise comparisons between colours in females (n=17) and males (n=15) (Experiment 5). Chi-square tests were done with Bonferroni correction to compare done to compare first choices and total visits. Corrected  $p=0.008$ . Significant results are in bold font.
